# Supplementary material for: Dysbiosis of gut microbiome affecting small intestine morphology and immune balance: a rhesus macaque model
Source: PubMed Central journal article supplement — Zool Res. 2020 Jan 18;41(1):20–31. doi: 10.24272/j.issn.2095-8137.2020.004 (PMC6956715; doi:10.24272/j.issn.2095-8137.2020.004), 2020-01-18
Supplement: zr-41-1-20-S1.pdf [file zr-41-1-20-S1.pdf]

## Supplementary Figures

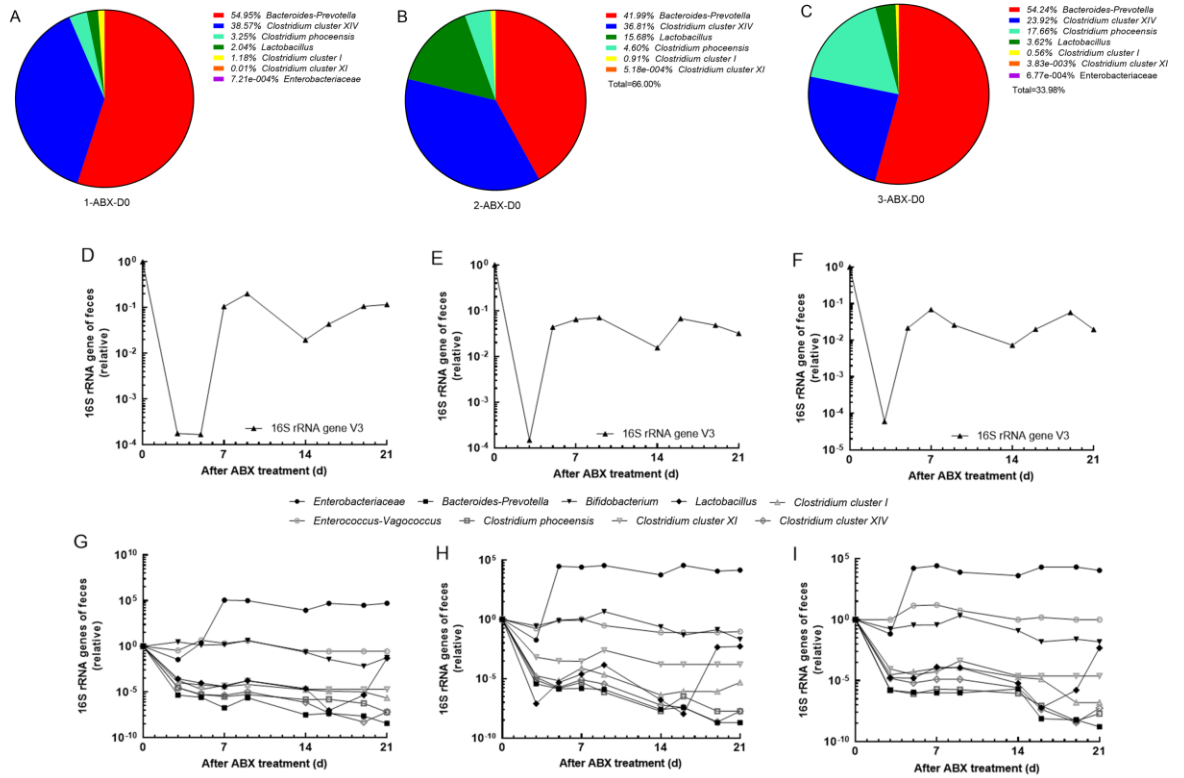

**Supplementary Figure S1 Relative quantitative RT-PCR-detected composition and abundance of intestinal bacteria**

Data from three rhesus monkeys. Total 16S and taxon-specific 16S qRT-PCR for *Bacteroides*, *Prevotella*, *Lactobacillus*, *Bifidobacterium*, *Enterococcus*, *Clostridium*, and *Enterobacteriaceae* examined commensal bacteria on day 0 (A–C), with normalized to day 0 gene expression after ABX treatment (D–I).

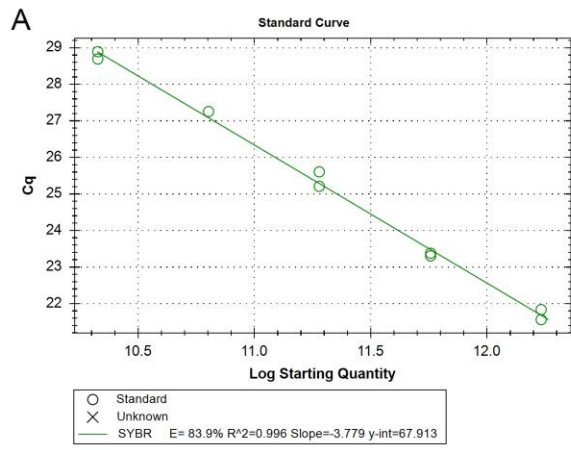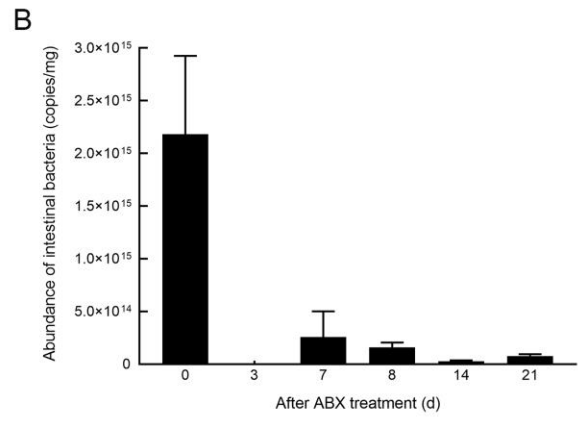

**Supplementary Figure S2 Quantitative RT-PCR-detected abundance of intestinal bacteria**

Data from three rhesus monkeys. Standard curve (A) and copies of commensal bacteria per milligram of feces (B).
